# Supplementary material for: Human Chromosome 18 and Acrocentrics: A Dangerous Liaison
Source: MDPI journal article supplement (doi:10.3390/ijms22115637), 2021-05-26
Supplement: s1 [file s1]

Table S5: Review of literature

| Authors                  | N° of cases | Breakpoint 18 | Acrocentric chromosome | Breakpoint acrocentric | Phenotype abn / n | Origin pat / mat | Chromosome abnormality               |
|--------------------------|-------------|---------------|------------------------|------------------------|-------------------|------------------|--------------------------------------|
| Prontera et al 2007 [1]  | 1           | p11.1         | 15                     | p11.2                  | 1 / 0             | n.r.             | dic(15;18)<br>del(18p)               |
| Witters et al 2002 [2]   | 1           | q11           | 13                     | p11                    | 1/0               | n.r.             | whole arm<br>not rcp tr.<br>del(18p) |
| *Ginzburg et al 1988 [3] | 1           | cen           | 22                     | cen                    | 1 / 0             | (russian paper)  | (russian paper)                      |
| Cooper et al 1993 [4]    | 4 (fam)     | p11           | 13                     | q11                    | 2° / 2°           | mat              | whole arm<br>rcp tr.                 |
| McGhee et al 2001 [5]    | 1           | q10           | 22                     | q10                    | 1 / 0             | mat              | dic(18;22)<br>del(18p)               |
| Wang et al 1997 [6]      | 2 ♂         | p11.1         | 21                     | p11.1                  | 2 / 0             | n.r.             | both<br>dic(18;21)<br>del(18p)       |
| Binkert et al 1990 [7]   | 4 (fam)     | q12           | 21                     | q11                    | 1 / 3§            | pat              | trisomy 18p                          |
| Sebold et al 2015 [8]    | 11          | cen           | 21 (2/11)              | n.r.                   | 11/0              | 1 mat            | del(18p)                             |
| Blattner et al 1980 [9]  | 6 (fam)     | q12           | 13                     | p13                    | 2 / 4             | mat              | partial<br>trisomy 18                |
| Gu et al 2011 [10]       | 1           | p11           | 21                     | q21                    | 0 / 1             | n.r.             | rcp tr                               |
| Chen et al 2003 [11]     | 2 (fam)     | p11.2         | 21                     | q22.3                  | 1 / 1             | mat              | tris18p,<br>rcp tr                   |
| Cotton et al 1993 [12]   | 6 (fam)     | q11           | 13                     | q12                    | 5^ / 1            | mat              | ^rcp tr                              |

abn: clinical phenotype, n: normal phenotype, rcp tr: reciprocal translocation, n.r.: not reported, \*: from english abstract of a russian paper,

°: mother balanced, 2 aborted fetuses unbalanced and 1 fetus triploid with balanced translocation, §: father, grandmother, uncle

^: 5 prenatal diagnoses of trisomy 18q, trisomy 18p, monosomy 18p

## References

1. Prontera, P.; Aiello, V.; Toschi, M.; Turci, A.; Gruppioni, R.; et al. Prenatal diagnosis of a de novo satellited chromosome 18 (18ps) associated with 18p deletion. *Genet Couns* **2007**, *18*(3), 309-15.
2. Witters, I.; Delattin, P.; Van Schoubroeck, D.; Fryns, J.P. Increased nuchal translucency with de novo acrocentric/18p translocation. *Genet Couns* **2002**, *13*(2), 203-5.
3. Ginzburg, I.A.; Lisichenko, O.V.; Kitaĭnik, G.P. [Case of unbalanced translocation (18, 22) in a child with congenital mental retardation]. *Tsitol Genet* **1988**, *22*(3), 52-3.
4. Cooper, P.J.; Towe, C.; Crolla, J.A. A balanced whole arm reciprocal translocation resulting in three different adverse pregnancy outcomes. *J Med Genet* **1993**, *30*(5), 417-8. doi: 10.1136/jmg.30.5.417.
5. McGhee, E.M.; Qu, Y.; Wohlferd, M.M.; Goldberg, J.D.; Norton, M.E.; Cotter, P.D. Prenatal diagnosis and characterization of an unbalanced whole arm translocation resulting in monosomy for 18p. *Clin Genet* **2001**, *59*(4), 274-8. doi: 10.1034/j.1399-0004.2001.590410.x.
6. Wang, J.C.; Nemana, L.; Kou, S.Y.; Habibian, R.; Hajianpour, M.J. Molecular cytogenetic characterization of 18;21 whole arm translocation associated with monosomy 18p. *Am J Med Genet* **1997**, *71*(4), 463-6.
7. Binkert, F.; Stranzinger, J.; Schinzel, A. Partial trisomy of chromosome 18 (pter----q12) following a familial 18;21 translocation rcp(18;21)(q12;q11). *Hum Hered* **1990**, *40*(2), 81-4. doi: 10.1159/000153910.
8. Sebold, C.; Soileau, B.; Heard, P.; Carter, E.; O'Donnell, L.; et al. Whole arm deletions of 18p: medical and developmental effects. *Am J Med Genet A* **2015**, *167A*(2), 313-23. doi: 10.1002/ajmg.a.36880.
9. Blattner, W.A.; Kistenmacher, M.L.; Tsai, S.; Punnett, H.H.; Giblett, E.R. Clinical manifestations of familial 13;18 translocation. *J Med Genet* **1980**, *17*(5), 373-9. doi: 10.1136/jmg.17.5.373.
10. Gu, L.; Zhang, H.; Zhu, G. Impact of reciprocal translocation t (18; 21) on male infertility and embryo development: lessons from an oocyte-donating ICSI cycle. *J Assist Reprod Genet* **2011**, *28*(7), 603-5. doi: 10.1007/s10815-011-9558-0.
11. Chen, C.P.; Chern, S.R.; Lee, C.C.; Chen, L.F.; Chin, D.T.; et al. Prenatal diagnosis of trisomy 18p and distal 21q22.3 deletion. *Prenat Diagn* **2003**, *23*(9), 758-61. doi: 10.1002/pd.684.
12. Cotton, C.; Cummins, M.; Smith, A. Alternate, adjacent 2 and 3:1 meiotic segregation products from a balanced t(13;18) (q12;q11) carrier. *Clin Genet* **1993**, *44*(4), 193-5. doi: 10.1111/j.1399-0004.1993.tb03878.x.
