# Supplementary material for: Human Chromosome 18 and Acrocentrics: A Dangerous Liaison
Source: MDPI journal article supplement (doi:10.3390/ijms22115637), 2021-05-26
Supplement: s1 [file s1]

**Table S2.** Summary of translocations involving non-acrocentric chromosomes with acrocentric chromosomes collected in the 3 centers in the period from 1999-2020. See Table S3 for details.

| Chromosome | Arm length<br>p/q* | Total<br>Mb** | N° breaks<br>interesting<br>acrocentrics | N° of breaks<br>per 100 Mb |
|------------|--------------------|---------------|------------------------------------------|----------------------------|
| 1          | 125000000          | 249           | 5                                        | 2,01                       |
|            | 124250621          |               |                                          |                            |
| 2          | 93300000           | 243           | 13                                       | 5,35                       |
|            | 149899373          |               |                                          |                            |
| 3          | 91000000           | 198           | 2                                        | 1,01                       |
|            | 107022430          |               |                                          |                            |
| 4          | 50400000           | 191           | 12                                       | 6,28                       |
|            | 140754276          |               |                                          |                            |
| 5          | 48400000           | 181           | 7                                        | 3,87                       |
|            | 132515260          |               |                                          |                            |
| 6          | 61000000           | 171           | 4                                        | 2,34                       |
|            | 110115067          |               |                                          |                            |
| 7          | 59900000           | 159           | 10                                       | 6,29                       |
|            | 99238663           |               |                                          |                            |
| 8          | 45600000           | 146           | 1                                        | 0,68                       |
|            | 100764022          |               |                                          |                            |
| 9          | 49000000           | 141           | 6                                        | 4,26                       |
|            | 92213431           |               |                                          |                            |
| 10         | 40200000           | 136           | 3                                        | 2,21                       |
|            | 95334747           |               |                                          |                            |
| 11         | 53700000           | 135           | 21                                       | 15,56                      |
|            | 81306516           |               |                                          |                            |
| 12         | 35800000           | 134           | 2                                        | 1,49                       |
|            | 98051895           |               |                                          |                            |
| 16         | 36600000           | 90            | 5                                        | 5,56                       |
|            | 53754753           |               |                                          |                            |
| 17         | 24000000           | 81            | 3                                        | 3,7                        |
|            | 57195210           |               |                                          |                            |
| 18         | 17200000           | 78            | 16                                       | 20,51                      |
|            | 60877248           |               |                                          |                            |
| 19         | 26500000           | 59            | 3                                        | 5,08                       |
|            | 32628983           |               |                                          |                            |
| 20         | 27500000           | 63            | 5                                        | 7,94                       |
|            | 35525520           |               |                                          |                            |
| X          | 60600000           | 155           | 1                                        | 0,65                       |
|            | 94670560           |               |                                          |                            |
| mean       |                    |               | 6,6                                      | 5,3                        |

\* from <https://www.biostars.org/p/383786/> accessed on 7 Apr 2021

\*\*UCSC Genome Browser GRCh37/hg19
