# Supplementary material for: Human Chromosome 18 and Acrocentrics: A Dangerous Liaison
Source: MDPI journal article supplement (doi:10.3390/ijms22115637), 2021-05-26
Supplement: s1 [file s1]

**Table S4.** 2D-FISH on nuclei of 72h PHA stimulated blood lymphocytes. All karyotypes were normal.

|                   |                            |                            |                            |                            |                            |                            |     |       |
|-------------------|----------------------------|----------------------------|----------------------------|----------------------------|----------------------------|----------------------------|-----|-------|
| cases             | 219-M                      | 215-M                      | 114-F                      | 133-F                      | 134-M                      | 220-F                      | tot | mean  |
| Probes            | D14/22Z1<br>D18Z1          | D14/22Z1<br>D18Z1          | D14/22Z1<br>D18Z1          | D14/22Z1<br>D18Z1          | D13/21Z1<br>D18Z1          | D13/21Z1<br>D18Z1          |     |       |
| Overlapping/close | 36                         | 39                         | 24                         | 23                         | 22                         | 33                         | 177 | 29,5  |
| distant           | 14                         | 11                         | 26                         | 27                         | 28                         | 17                         | 123 | 20,5  |
| total n°          | 50                         | 50                         | 50                         | 50                         | 50                         | 50                         | 300 |       |
|                   |                            |                            |                            |                            |                            |                            |     |       |
| Probes            | Control<br>probe/<br>D18Z1 | Control<br>probe/<br>D18Z1 | Control<br>probe/<br>D18Z1 | Control<br>probe/<br>D18Z1 | Control<br>probe/<br>D18Z1 | Control<br>probe/<br>D18Z1 | tot | mean  |
| Overlapping/close | 11                         | 15                         | 15                         | 17                         | 12                         | 16                         | 86  | 14,33 |
| distant           | 39                         | 35                         | 35                         | 33                         | 38                         | 34                         | 214 | 35,7  |
| total n°          | 50                         | 50                         | 50                         | 50                         | 50                         | 50                         | 300 |       |

M: normal male; F: normal female
