# Supplementary material for: Human Chromosome 18 and Acrocentrics: A Dangerous Liaison
Source: MDPI journal article supplement (doi:10.3390/ijms22115637), 2021-05-26
Supplement: s1 [file s1]

**Table S3.** Breakpoint details of translocations between non-acrocentric chromosomes and acrocentric chromosomes collected in the three centers in the period from 1999-2020.

| Non-acrocentric chromosomes | Acrocentric chromosomes |       |       |       |       |
|-----------------------------|-------------------------|-------|-------|-------|-------|
|                             | 13                      | 14    | 15    | 21    | 22    |
| 1p34.1                      |                         | q32.3 |       |       |       |
| 1p34.1                      |                         |       |       |       | q13.1 |
| 1p32                        | q32                     |       |       |       |       |
| 1q41                        |                         | q32.1 |       |       |       |
| 1q42                        |                         |       | q11.2 |       |       |
| 2p25                        |                         | q11.2 |       |       |       |
| 2p25                        |                         |       |       | q11   |       |
| 2p12                        |                         |       |       | q21   |       |
| 2p11.2                      |                         |       |       | q22.1 |       |
| 2q13                        |                         |       | q11.2 |       |       |
| 2q21                        |                         | q24   |       |       |       |
| 2q21.1                      |                         |       | q15   |       |       |
| 2q21.1                      |                         | q24.3 |       |       |       |
| 2q31                        |                         |       | q22.1 |       |       |
| 2q31                        |                         | q31   |       |       |       |
| 2q33                        | q14                     |       |       |       |       |
| 2q33.1                      | q32.1                   |       |       |       |       |
| 2q37.3                      |                         |       | q24   |       |       |
| 3p14                        |                         |       | q21   |       |       |
| 3q13.2                      | q22                     |       |       |       |       |
| 4p15.2                      | q21.2                   |       |       |       |       |
| 4p14                        | q14.1                   |       |       |       |       |
| 4p14                        |                         | q22   |       |       |       |
| 4p14                        |                         |       |       | q22.1 |       |
| 4p12                        |                         |       |       | p12   |       |
| 4q12                        |                         |       |       | q11.2 |       |
| 4q12                        |                         |       |       |       | q13   |
| 4q21.1                      |                         |       |       | q22.3 |       |
| 4q21.1                      | q21.2                   |       |       |       |       |
| 4q27                        |                         | q11.2 |       |       |       |
| 4q31.3                      |                         |       | q22.1 |       |       |
| 4q33                        |                         |       | q26.3 |       |       |
| 5p15.3                      |                         |       |       | q21   |       |
| 5p14                        | q32                     |       |       |       |       |
| 5q11.2                      | q12                     |       |       |       |       |
| 5q13.1                      |                         |       |       | q21   |       |
| 5q21.2                      |                         |       | q13   |       |       |
| 5q22                        |                         |       |       |       | q11.2 |
| 5q34                        |                         |       | q24   |       |       |
| 6p21.3                      | q12                     |       |       |       |       |
| 6p21.1                      |                         | q32.1 |       |       |       |
| 6q23.1                      |                         |       |       | q22.3 |       |

|         |       |       |       |       |       |
|---------|-------|-------|-------|-------|-------|
| 6q26    |       |       |       | q22.2 |       |
| 7p13    | q32   |       |       |       |       |
| 7p13    |       | q13   |       |       |       |
| 7q11.2  | q21   |       |       |       |       |
| 7q11.23 |       |       | q26.1 |       |       |
| 7q31.1  |       |       |       | q22.3 |       |
| 7q32    | q32   |       |       |       |       |
| 7q32    |       |       |       |       | 13.1  |
| 7q36.1  |       | q32.3 |       |       |       |
| 7q36.2  |       | p11.1 |       |       |       |
| 7q36.3  |       | p11.2 |       |       |       |
| 8q24.1  |       |       | q11.2 |       |       |
| 9p24    |       |       |       |       | q11   |
| 9p24    |       |       |       |       | q13.1 |
| 9p22    |       |       |       | q22.3 |       |
| 9q32    |       |       | p11.1 |       |       |
| 9q32    | q14   |       |       |       |       |
| 9q34.1  |       |       |       |       | q11.2 |
| 10p14   | q21.1 |       |       |       |       |
| 10p11.2 |       |       | q21   |       |       |
| 10q11.1 |       | q11.1 |       |       |       |
| 11p11.2 |       | q11.1 |       |       |       |
| 11p11.2 |       |       | q26.1 |       |       |
| 11p11.2 | q12.1 |       |       |       |       |
| 11q12   | q14.1 |       |       |       |       |
| 11q13   |       | q24.1 |       |       |       |
| 11q23   |       |       |       |       | q11   |
| 11q23   |       |       |       |       | q11   |
| 11q23   |       |       |       |       | q11   |
| 11q23   |       |       |       |       | q11.2 |
| 11q23   |       |       |       |       | q11.2 |
| 11q23   |       |       |       |       | q11.2 |
| 11q23   |       |       |       |       | q11.2 |
| 11q23   |       |       |       |       | q11.2 |
| 11q23   |       |       |       |       | q11.2 |
| 11q23.3 |       |       |       |       | q11.2 |
| 11q23.3 |       |       |       |       | q11.2 |
| 11q23.3 |       |       |       |       | q11.2 |
| 11q23.3 |       |       |       |       | q11.2 |
| 11q23.3 |       |       |       |       | q11.2 |
| 11q23.3 |       |       |       |       | q11.2 |
| 11q23.3 |       |       |       |       | q11.2 |
| 12q13   | q12   |       |       |       |       |
| 12q24.1 |       |       | q24   |       |       |
| 16p13.1 |       |       |       | q22.3 |       |
| 16p13.1 |       |       | q26.3 |       |       |
| 16p13.1 |       |       | q15   |       |       |
| 16p11.2 | q22   |       |       |       |       |

|         |        |       |       |       |       |
|---------|--------|-------|-------|-------|-------|
| 16q24.3 | q12.11 |       |       |       |       |
| 17p13   |        |       | q24   |       |       |
| 17p12   |        |       | p11.2 |       |       |
| 17p11.2 |        |       | p12   |       |       |
| 19p13.3 |        |       | q24   |       |       |
| 19q13.1 |        |       |       |       | q11.2 |
| 19q13.4 |        |       |       | q22.2 |       |
| 20p13   |        |       |       | q22.1 |       |
| 20q11.2 |        |       |       | q22.1 |       |
| 20q13.2 |        | q24.3 |       |       |       |
| 20q13.3 |        |       |       |       | p13   |
| 20q13.3 |        |       | q22.3 |       |       |
| Xp22    |        | q22   |       |       |       |
