# Supplementary material for: Human Chromosome 18 and Acrocentrics: A Dangerous Liaison
Source: MDPI journal article supplement (doi:10.3390/ijms22115637), 2021-05-26
Supplement: s1 [file s1]

**Table S1.** Breakpoint details of translocations of chromosome 18 identified in the 3 centers during the period 1999-2020. The colors indicate the different cytogenetic bands of chromosome 18 as in Fig 7. The brackets in the first column show the case reports described in the results.

|              | karyotype                        | breakpoint 18 | breakpoint partner  |
|--------------|----------------------------------|---------------|---------------------|
| <b>Lab 1</b> |                                  |               |                     |
| 1            | 46,t(9;18)                       | q11.2         | p13                 |
| 2            | 46,t(5;18)                       | p11.2         | q13.3               |
| 3            | 46,t(12;18)                      | q12.1         | q15                 |
| 4            | 46,t(4;18)                       | q21.3         | q27                 |
| 5            | 46,t(4;18)                       | q21.3         | q25                 |
| 6 (case 3)   | 46,der(18)t(18;22)               | q10           | q10                 |
| 7 (case 2)   | 45, der(18)t(18;22)              | q10 (?)       | q10 (?)             |
| 8* (case 6)  | 45,psu dic(22;18)                | p11.32        | p13                 |
| 9            | 46,t(14;18)                      | q21.3         | q24.3               |
| 10           | 46,t(13;18)                      | p11.2         | q32                 |
| 11 (case 4)  | 46,t(15;18)                      | p10           | q11.2               |
| <b>Lab 2</b> |                                  |               |                     |
| 1            | 46,t(14;18)                      | q12           | q21                 |
| 2            | 46,t(5;18)                       | q22           | q32                 |
| 3            | 46,der(18)(t(4;18)               | q22.3         | p11.2               |
| 4            | 46,t(18;20)                      | p11.2         | p11.2               |
| 5            | 46,t(4;18)                       | q21.3         | q25                 |
| 6            | 46,t(13;18)                      | q21.3         | q22.3               |
| 7 (case 1)   | 45,t(13;18)                      | q10           | q10                 |
| <b>Lab 3</b> |                                  |               |                     |
| 1            | 46,t(2;18)                       | q11.2         | q34                 |
| 2            | 46,t(14;18)                      | q21.3         | q21                 |
| 3* (case 6)  | 45,psu dic(22;18)                | p11.32        | p13                 |
| 4            | 46,t(12;18)                      | q22           | q15                 |
| 5            | 46,t(12;18)                      | q21           | q21                 |
| 6            | 46,t(8;14;18)(q21.1;q24.3;q11.2) | q11.2         | 8q21.1; 14q24.3     |
| 7            | 46,t(5;18)                       | p11.22        | p15.31              |
| 8            | 46,t(13;18)                      | p11.32        | q22                 |
| 9            | mos 46,t(5;18)[40]/46[60]        | q12.2         | p13.2               |
| 10**         | 46,t(6;13;18;9)                  | q11.2;        | 6p12; 13q12.1; 9q13 |
|              |                                  | p11.2         |                     |
| 11           | 46,t(14;18)                      | q12.2         | q13                 |
| 12           | 46,t(2;18)                       | q21.1         | q31.1               |
| 13 (case 5)  | 46,+18,der(18;21)                | q10           | q10                 |

\*: proband and father

\*\*Patient 10 of Lab 3 has two breaks on chromosome 18

In bold the breakpoints on chromosome 18 involving acrocentrics
