# Supplementary material for: Human Chromosome 18 and Acrocentrics: A Dangerous Liaison
Source: Int J Mol Sci. 2021 May 26;22(11):5637. doi: 10.3390/ijms22115637 (PMC8198063; doi:10.3390/ijms22115637)
Supplement: Supplementary file 1 [file ijms-22-05637-s001.zip]

Archive with 6 entries (6 files):
- Supplementary figures_rev.pdf
- Table S1.Rev.pdf
- Table S2Rev.pdf
- Table S3.Rev.pdf
- Table S4.pdf
- Table S5.pdf
